# Supplementary material for: Influence of Household Rat Infestation on Leptospira Transmission in the Urban Slum Environment
Source: PLoS Negl Trop Dis. 2014 Dec 4;8(12):e3338. doi: 10.1371/journal.pntd.0003338 (PMC4256176; doi:10.1371/journal.pntd.0003338)
Supplement: Table S1 — English and Portuguese description of variables included in the modified exterior inspection form, adapted from the CDC manual. (DOCX) [file pntd.0003338.s001.docx]

**Supplemental table 1.** English and Portuguese description of variables included in the modified exterior inspection form, adapted from the CDC manual.

| **Variables** | **CDC Survey form No.** a | **Comments** |
| --- | --- | --- |
| **Demographics** |  |  |
| Number of inhabitants | - | New |
| Proportion of males | - | New |
| Per capita income, US$/d | - | New |
| Squatter household | - | New |
| **Premise type and details** |  |  |
| Residential use only | 1 | Included |
| Commercial & residential | 2 | Included |
| Commercial | 3 | Not included |
| Vacant lot | 4 | Modified: Borders on a vacant lot |
| Food commercial establishment | 5 | Not included |
| Vacant | 6 | Not included |
| No. of dwelling units | 7 | Not included |
| Sewer on premise | 8 | Modified: Open sewer <10m |
| Distance from open sewer, m | - | New |
| Distance from open refuse deposit, m | - | New |
| Level above lowest point in valley, m | - | New |
| Borders an abandoned house | - | New |
| **Access to food sources** |  |  |
| Unapproved refuse storage | 9 | Not included |
| Exposed garbage | 10 | Included |
| Animal food | 11 | Included |
| Other food & plants | 12 | Included |
| Fruit trees | - | New |
| Open stores of human food | - | New |
| **Rodent access to water** |  |  |
| Standing water | 13 | Included |
| Condensate | 14 | Not included |
| Leaks | 15 | Included |
| **Harborage for rodents** |  |  |
| Abandoned vehicles | 16 | Included |
| Abandoned appliances | 17 | Included |
| Lumber/clutter on ground | 18 | Included |
| Other large rubbish | 19 | Included |
| Outbuildings /privies | 20 | Included |
| Dilapidated fences & walls | 21 | Included |
| Plant related | 22 | Included |
| Bushes or shrubbery | - | New |
| Ornamental plants | - | New |
| Presence of exposed earth | - | New |
| Built on earthen slopeb | - | New |
| **Entry/Access of rodents** |  |  |
| Structural deficiencies | 23 | Included |
| Pipe/wiring gaps | 24 | Not included |
| Hole(s) in roof | - | New |
| Hole(s) in wall | - | New |
| Hole(s) in floor | - | New |
| Un-plastered wallsc | - | New |
| **Signs of rodent infestation** |  |  |
| Active signs | 25 | Included |
| Rodent burrows | - | New |
| Rodent runs | - | New |
| *R. norvegicus* fecesd | - | New |
| *R. rattus* fecese | - | New |
| *M. musculus* fecesf | - | New |
| **Number of domestic animals** |  | New |
| Dogs | - | New |
| Cats | - | New |
| Chickens | - | New |
| Others |  | New |

aVariable number in the CDC form [[22](#_ENREF_22)].

bPresence of uncovered terrain slope, with angle >45º, localized to a ≤ 10m of the household.

cHousehold walls without stucco application in the exterior surface and where is possible to observe the wall bricks.

dCapsule shaped and about 20mm long.

eEllipsoid shaped and about 12mm long.

fSpindle shaped and about 6mm long.

| **Variáveis** | **Questionário ambiental CDC No.** a | **Comentários** |
| --- | --- | --- |
| **Demográficas** |  |  |
| Número de moradores | - | Nova |
| Proporção de homens | - | Nova |
| Renda *per capita*, US$/d | - | Nova |
| Invasão | - | Nova |
| **Características do domicílio** |  |  |
| Residência | 1 | Incluída |
| Comercial e residencial | 2 | Incluída |
| Comercial | 3 | Não Incluída |
| Local baldio | 4 | Modificada: Limita com casa abandonada |
| Comercio de alimentos | 5 | Não Incluída |
| Local vacante | 6 | Não Incluída |
| No. unidades habitacionais | 7 | Não Incluída |
| Esgoto no local | 8 | Modificada: Distancia a esgoto aberto, m |
| Distancia a esgoto aberto, m | - | Nova |
| Distancia a resíduos expostos, m | - | Nova |
| Nível acima do ponto mais baixo do vale, m | - | Nova |
| Limita com casa abandonada | - | Nova |
| **Aceso a fontes de alimento** |  |  |
| Armazenamento de lixo inadequado | 9 | Não Incluída |
| Resíduos expostos | 10 | Incluída |
| Alimento para animais | 11 | Incluída |
| Outros alimentos e plantas | 12 | Incluída |
| Árvores frutíferas | - | Nova |
| Armazenamento inadequado de alimento para humanos | - | Nova |
| **Acesso a água** |  |  |
| Água empoçada | 13 | Incluída |
| Condensação | 14 | Não Incluída |
| Vazamentos | 15 | Incluída |
| **Refúgio para roedores** |  |  |
| Carros abandonados | 16 | Incluída |
| Artefactos abandonados | 17 | Incluída |
| Serralha ou entulho | 18 | Incluída |
| Resíduos maiores | 19 | Incluída |
| Galpões/banheiros externos | 20 | Incluída |
| Cercas e muros | 21 | Incluída |
| Plantas e derivados | 22 | Incluída |
| Arbustos | - | Nova |
| Plantas ornamentais | - | Nova |
| Peridomicílio com chão de terra | - | Nova |
| Ladeira de terrab | - | Nova |
| **Acesso ao domicílio** |  |  |
| Deficiências estruturais | 23 | Incluída |
| Buracos (tubulação/eletricidade) | 24 | Não Incluída |
| Buraco(s) no teto | - | Nova |
| Buraco(s) no muro | - | Nova |
| Buraco(s) no chão | - | Nova |
| Parede não rebocadac | - | Nova |
| **Sinais de infestação por roedores** |  |  |
| Sinais ativas | 25 | Incluída |
| Tocas de roedores | - | Nova |
| Trilhas de roedores | - | Nova |
| Fezes de *R. norvegicus*d | - | Nova |
| Fezes de *R. rattus*e | - | Nova |
| Fezes de *M. musculus*f | - | Nova |
| **Número de animais domésticos** |  | Nova |
| Cães | - | Nova |
| Gatos | - | Nova |
| Galinhas | - | Nova |
| Outros |  | Nova |

aNúmero da variavel no questionario ambiental do CDC [[22](#_ENREF_22)].

bPresenca de ladeira de terra, com angulo >45º, localizada a ≤ 10m do domicilio.

cDomicilio com paredes nao rebocadas na superficie exterior e onde é possivel observer os tijolos do muro.

dForma capsular de aproximadamente 20mm de cumprimento.

eForma fusiformes de aproximadamente 12mm de cumprimento.

f Forma fusiforme de aproximadamente 6mm de cumprimento.
